# Supplementary material
Source: PubMed Central journal article supplement (PMC3524415)
Supplement: NIHMS416033-supplement-Supplementary_Figures.pdf [file NIHMS416033-supplement-Supplementary_Figures.pdf]

## Supplementary Tables and Figures

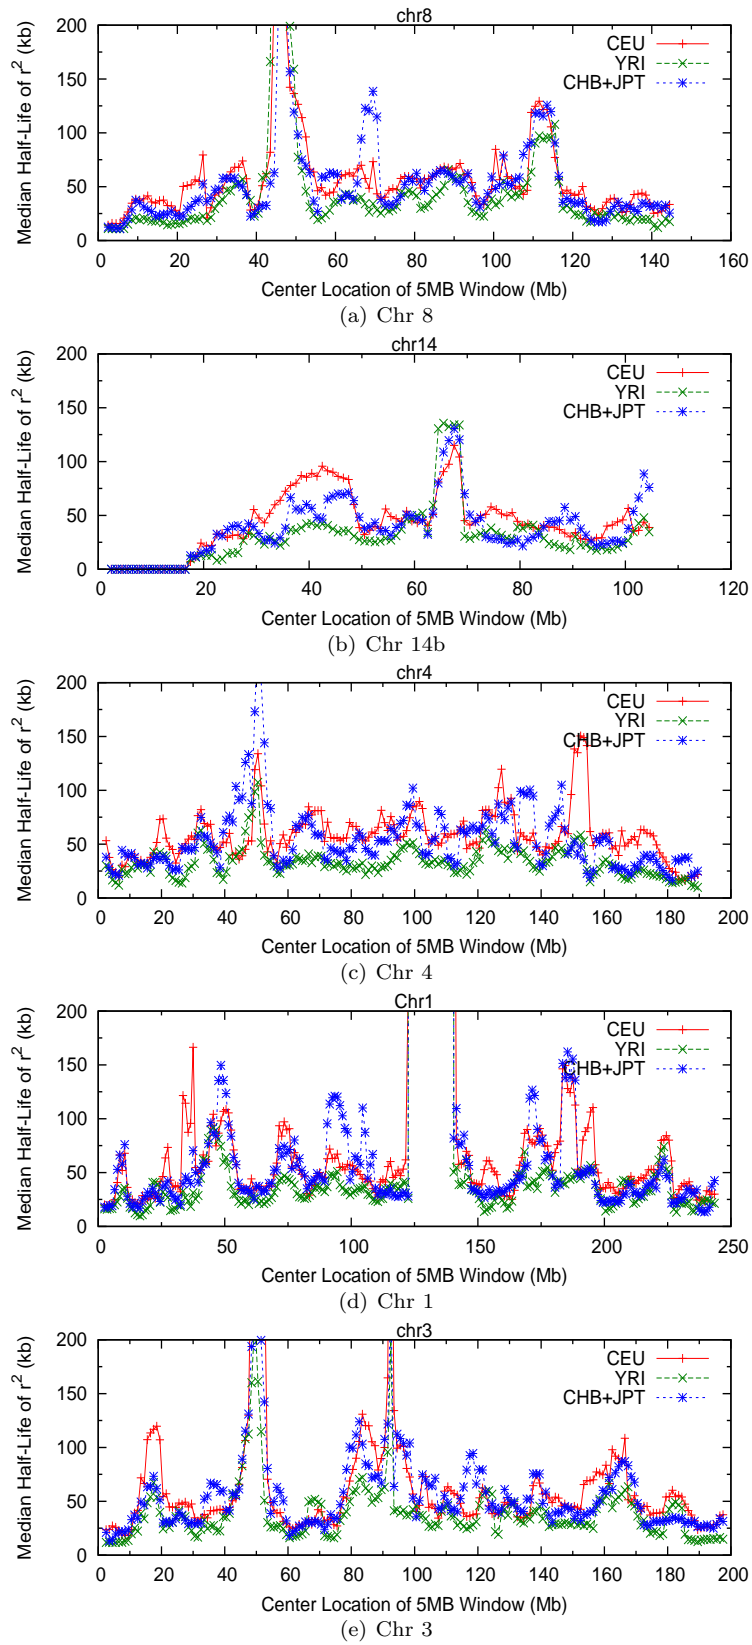

**Fig. S1.** Median  $r^2$  half-life value of 5Mb windows on 5 chromosomes

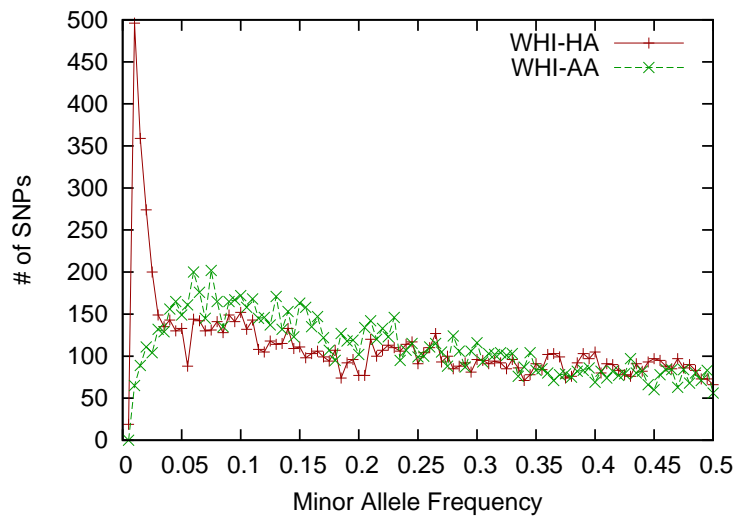

**Fig. S2.** Minor Allele Frequency (MAF) distribution of SNPs in WHI-AA and WHI-HA.

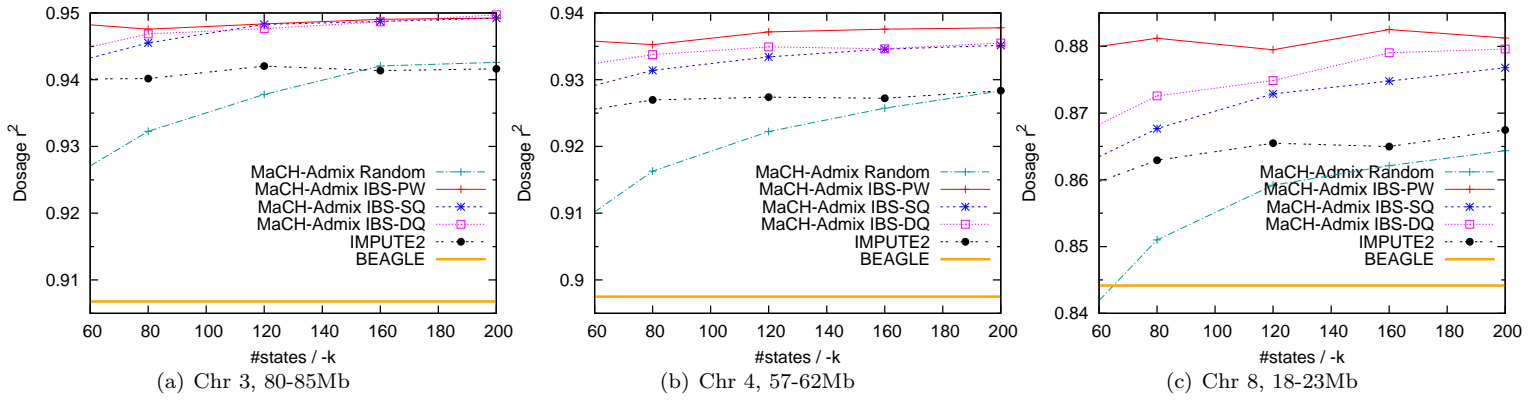

S3A: Overall imputation quality of HapMap ASW with the 1000G reference panel

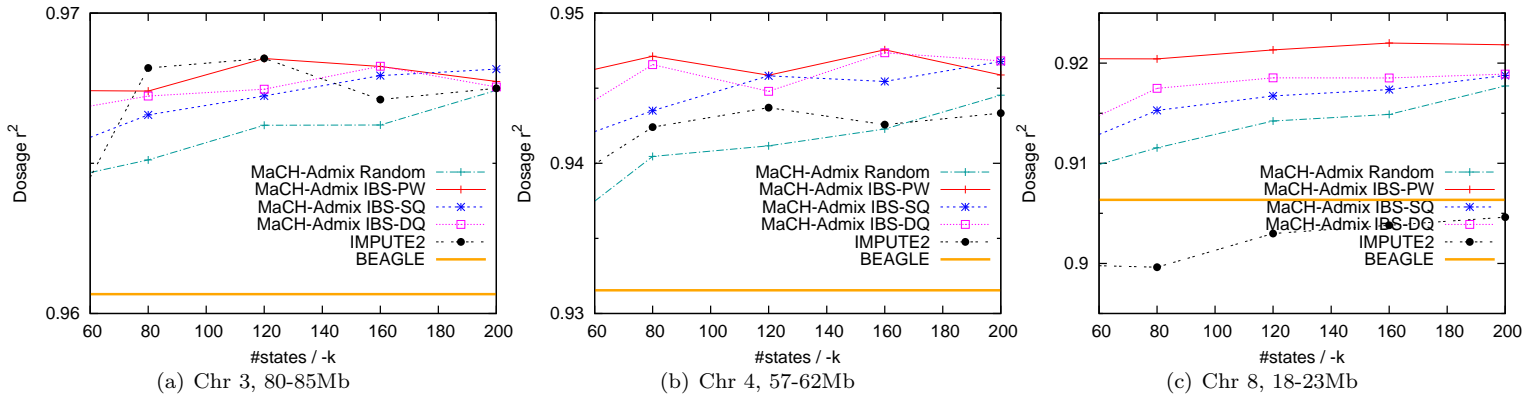

S3B: Overall imputation quality of HapMap MEX with the 1000G reference panel

**Fig. S3.** Imputation of 49 HapMap ASW and 50 HapMap MEX individuals with the 1000G reference panel. Imputation quality (measured by dosage  $r^2$ ) is plotted as a function of the effective reference panel size (i.e., #states), for WHI-AA individuals in three selected 5Mb regions (ordered by LD from high to low).

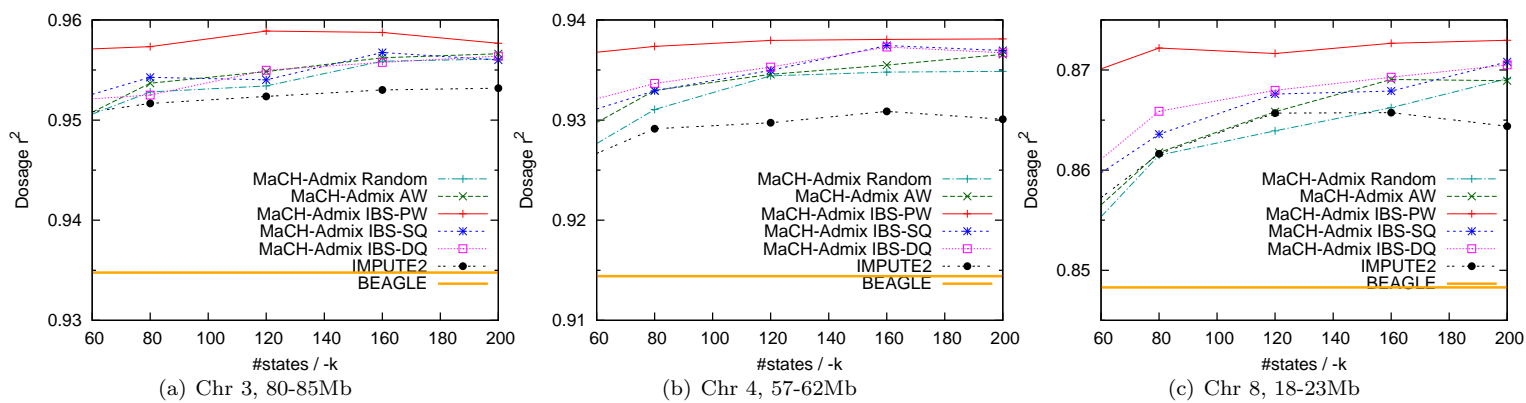

**Fig. S4.** Imputation quality of ASW with HapMapII CEU+YRI+LWK+MKK reference panel. Imputation quality (measured by dosage  $r^2$ ) is plotted as a function of the effective reference panel size (i.e., #states), for ASW individuals in three selected 5Mb regions (ordered by LD from high to low).

**Table S1.** Median Half Life of  $r^2$  (in Kb)

|                      | CEU | YRI | JPT+CHB |
|----------------------|-----|-----|---------|
| 10th Percentile      | 26  | 16  | 22      |
| 30th Percentile      | 38  | 24  | 32      |
| 50th Percentile      | 48  | 30  | 41      |
| 70th Percentile      | 60  | 39  | 55      |
| 90th Percentile      | 92  | 57  | 83      |
| chromosome3:80-85Mb  | 106 | 70  | 124     |
| chromosome1:75-80Mb  | 69  | 38  | 80      |
| chromosome4:57-62Mb  | 47  | 31  | 32      |
| chromosome14:50-55Mb | 40  | 25  | 43      |
| chromosome8:18-23Mb  | 25  | 16  | 23      |

Percentiles are calculated within each population using all 5Mb windows across the genome.

**Table S2.** Imputation Results of HapMap ASW & MEX Individuals over Five 5Mb Regions with the 1000G reference ( $H = 2188$ )

|                      | 49 ASW Individuals                |                                         |                 | 50 MEX Individuals                |                                         |                 |
|----------------------|-----------------------------------|-----------------------------------------|-----------------|-----------------------------------|-----------------------------------------|-----------------|
|                      | overall dosage $r^2$<br>(std dev) | uncommon SNPs<br>dosage $r^2$ (std dev) | running<br>time | overall dosage $r^2$<br>(std dev) | uncommon SNPs<br>dosage $r^2$ (std dev) | running<br>time |
| chromosome3:80-85Mb  |                                   |                                         |                 |                                   |                                         |                 |
| MaCH-Admix Random    | 0.937(0.104)                      | 0.854(0.210)                            | 189             | 0.966(0.080)                      | 0.960(0.149)                            | 173             |
| MaCH-Admix IBS-PW    | <b>0.948(0.095)</b>               | 0.888(0.192)                            | 252             | <b>0.968(0.077)</b>               | <b>0.968(0.148)</b>                     | 212             |
| MaCH-Admix IBS-SQ    | <b>0.948(0.091)</b>               | <b>0.898(0.176)</b>                     | 220             | 0.967(0.079)                      | 0.961(0.148)                            | 203             |
| MaCH-Admix IBS-DQ    | 0.947(0.095)                      | 0.889(0.190)                            | 220             | 0.967(0.079)                      | 0.963(0.149)                            | 221             |
| IMPUTE2              | 0.942(0.106)                      | 0.877(0.201)                            | 457             | <b>0.968(0.086)</b>               | 0.953(0.187)                            | 477             |
| BEAGLE               | 0.906(0.137)                      | 0.774(0.267)                            | 2388            | 0.960(0.096)                      | 0.938(0.196)                            | 2760            |
| chromosome1:75-80Mb  |                                   |                                         |                 |                                   |                                         |                 |
| MaCH-Admix Random    | 0.915(0.135)                      | 0.828(0.233)                            | 273             | 0.937(0.132)                      | 0.854(0.238)                            | 257             |
| MaCH-Admix IBS-PW    | <b>0.930(0.123)</b>               | <b>0.859(0.216)</b>                     | 329             | <b>0.940(0.134)</b>               | 0.867(0.250)                            | 302             |
| MaCH-Admix IBS-SQ    | 0.926(0.128)                      | 0.849(0.222)                            | 331             | 0.938(0.130)                      | <b>0.870(0.235)</b>                     | 293             |
| MaCH-Admix IBS-DQ    | 0.928(0.127)                      | 0.852(0.227)                            | 330             | 0.938(0.132)                      | 0.866(0.243)                            | 299             |
| IMPUTE2              | 0.915(0.140)                      | 0.842(0.229)                            | 609             | 0.933(0.140)                      | 0.847(0.270)                            | 549             |
| BEAGLE               | 0.900(0.148)                      | 0.817(0.245)                            | 3195            | 0.931(0.144)                      | 0.839(0.264)                            | 3779            |
| chromosome4:57-62Mb  |                                   |                                         |                 |                                   |                                         |                 |
| MaCH-Admix Random    | 0.922(0.116)                      | 0.801(0.230)                            | 283             | 0.941(0.127)                      | 0.873(0.228)                            | 244             |
| MaCH-Admix IBS-PW    | <b>0.937(0.107)</b>               | <b>0.852(0.220)</b>                     | 325             | <b>0.945(0.118)</b>               | <b>0.896(0.203)</b>                     | 298             |
| MaCH-Admix IBS-SQ    | 0.933(0.110)                      | 0.837(0.224)                            | 322             | <b>0.945(0.116)</b>               | 0.894(0.200)                            | 286             |
| MaCH-Admix IBS-DQ    | 0.934(0.107)                      | 0.845(0.215)                            | 325             | 0.944(0.119)                      | 0.883(0.210)                            | 290             |
| IMPUTE2              | 0.927(0.116)                      | 0.819(0.238)                            | 743             | 0.943(0.120)                      | 0.889(0.207)                            | 785             |
| BEAGLE               | 0.897(0.144)                      | 0.755(0.284)                            | 4364            | 0.931(0.143)                      | 0.839(0.263)                            | 5677            |
| chromosome14:50-55Mb |                                   |                                         |                 |                                   |                                         |                 |
| MaCH-Admix Random    | 0.899(0.144)                      | 0.739(0.280)                            | 392             | 0.947(0.119)                      | 0.891(0.218)                            | 366             |
| MaCH-Admix IBS-PW    | <b>0.914(0.134)</b>               | 0.769(0.273)                            | 438             | <b>0.951(0.118)</b>               | <b>0.900(0.218)</b>                     | 420             |
| MaCH-Admix IBS-SQ    | 0.909(0.138)                      | 0.765(0.282)                            | 419             | 0.948(0.120)                      | 0.896(0.223)                            | 420             |
| MaCH-Admix IBS-DQ    | 0.909(0.135)                      | 0.763(0.264)                            | 438             | 0.947(0.122)                      | 0.889(0.231)                            | 429             |
| IMPUTE2              | 0.901(0.145)                      | <b>0.770(0.281)</b>                     | 636             | 0.940(0.126)                      | 0.874(0.234)                            | 562             |
| BEAGLE               | 0.879(0.167)                      | 0.677(0.325)                            | 4868            | 0.939(0.128)                      | 0.872(0.232)                            | 4643            |
| chromosome8:18-23Mb  |                                   |                                         |                 |                                   |                                         |                 |
| MaCH-Admix Random    | 0.859(0.172)                      | 0.755(0.283)                            | 420             | 0.914(0.145)                      | 0.892(0.200)                            | 404             |
| MaCH-Admix IBS-PW    | <b>0.879(0.162)</b>               | <b>0.792(0.280)</b>                     | 523             | <b>0.921(0.140)</b>               | <b>0.908(0.186)</b>                     | 487             |
| MaCH-Admix IBS-SQ    | 0.872(0.164)                      | 0.775(0.282)                            | 537             | 0.916(0.145)                      | 0.898(0.197)                            | 485             |
| MaCH-Admix IBS-DQ    | 0.874(0.166)                      | 0.774(0.293)                            | 526             | 0.918(0.143)                      | 0.901(0.196)                            | 495             |
| IMPUTE2              | 0.865(0.173)                      | 0.767(0.298)                            | 818             | 0.902(0.164)                      | 0.864(0.247)                            | 854             |
| BEAGLE               | 0.844(0.181)                      | 0.760(0.285)                            | 6295            | 0.906(0.156)                      | 0.875(0.233)                            | 6509            |

All results were generated using the following parameter values: MaCH-Admix: `--rounds 30, --states 120, --imputeStates 500`; IMPUTE2: `-iter 30, -k 120, -k_hap 500`; BEAGLE: `niterations=10 nsamples=4`. Running time is measured in seconds. Best performance in each comparison is highlighted by bold font.

**Table S3.** Imputation Results of WHI-HA Individuals over Five 5Mb Regions with the HapMapII reference ( $H = 420$ )

|                      | All 3587 individuals              |                                         |                 | Random 200 Subset                 |                                         |                 |
|----------------------|-----------------------------------|-----------------------------------------|-----------------|-----------------------------------|-----------------------------------------|-----------------|
|                      | overall dosage $r^2$<br>(std dev) | uncommon SNPs<br>dosage $r^2$ (std dev) | running<br>time | overall dosage $r^2$<br>(std dev) | uncommon SNPs<br>dosage $r^2$ (std dev) | running<br>time |
| chromosome3:80-85Mb  |                                   |                                         |                 |                                   |                                         |                 |
| MaCH-Admix Random    | 0.897(0.157)                      | 0.864(0.091)                            | 9907            | 0.885(0.150)                      | 0.807(0.101)                            | 234             |
| MaCH-Admix IBS-PW    | <b>0.905(0.150)</b>               | 0.918(0.021)                            | 10373           | <b>0.888(0.150)</b>               | 0.831(0.081)                            | 248             |
| MaCH-Admix IBS-SQ    | 0.904(0.150)                      | 0.913(0.033)                            | 11303           | 0.887(0.150)                      | 0.838(0.088)                            | 246             |
| MaCH-Admix IBS-DQ    | 0.904(0.150)                      | 0.911(0.036)                            | 10434           | <b>0.888(0.147)</b>               | <b>0.845(0.082)</b>                     | 247             |
| IMPUTE2              | 0.904(0.148)                      | <b>0.924(0.011)</b>                     | 8874            | 0.887(0.144)                      | 0.843(0.044)                            | 403             |
| BEAGLE               | 0.892(0.159)                      | 0.902(0.062)                            | 11877           | 0.873(0.164)                      | 0.831(0.106)                            | 232             |
| chromosome1:75-80Mb  |                                   |                                         |                 |                                   |                                         |                 |
| MaCH-Admix Random    | 0.855(0.184)                      | 0.752(0.222)                            | 14227           | 0.857(0.185)                      | 0.723(0.253)                            | 350             |
| MaCH-Admix IBS-PW    | <b>0.863(0.176)</b>               | 0.762(0.201)                            | 13328           | 0.859(0.183)                      | 0.721(0.236)                            | 367             |
| MaCH-Admix IBS-SQ    | 0.860(0.179)                      | 0.748(0.204)                            | 15146           | <b>0.860(0.181)</b>               | 0.715(0.234)                            | 363             |
| MaCH-Admix IBS-DQ    | 0.861(0.178)                      | 0.750(0.204)                            | 15878           | 0.858(0.183)                      | 0.712(0.237)                            | 377             |
| IMPUTE2              | 0.842(0.188)                      | 0.740(0.248)                            | 11782           | 0.840(0.194)                      | 0.701(0.282)                            | 556             |
| BEAGLE               | 0.851(0.186)                      | <b>0.792(0.230)</b>                     | 15446           | 0.849(0.191)                      | <b>0.795(0.250)</b>                     | 296             |
| chromosome4:57-62Mb  |                                   |                                         |                 |                                   |                                         |                 |
| MaCH-Admix Random    | 0.852(0.169)                      | 0.742(0.237)                            | 14728           | 0.863(0.165)                      | 0.775(0.210)                            | 343             |
| MaCH-Admix IBS-PW    | <b>0.862(0.162)</b>               | <b>0.764(0.217)</b>                     | 17051           | <b>0.869(0.162)</b>               | <b>0.787(0.201)</b>                     | 360             |
| MaCH-Admix IBS-SQ    | 0.860(0.161)                      | 0.756(0.223)                            | 16123           | 0.868(0.162)                      | 0.779(0.211)                            | 362             |
| MaCH-Admix IBS-DQ    | 0.860(0.161)                      | 0.757(0.224)                            | 15364           | 0.867(0.164)                      | 0.786(0.205)                            | 363             |
| IMPUTE2              | 0.844(0.176)                      | 0.717(0.231)                            | 12369           | 0.847(0.180)                      | 0.732(0.221)                            | 541             |
| BEAGLE               | 0.850(0.168)                      | 0.740(0.234)                            | 17503           | 0.851(0.174)                      | 0.734(0.263)                            | 348             |
| chromosome14:50-55Mb |                                   |                                         |                 |                                   |                                         |                 |
| MaCH-Admix Random    | 0.845(0.190)                      | 0.669(0.285)                            | 19813           | 0.850(0.191)                      | 0.677(0.290)                            | 428             |
| MaCH-Admix IBS-PW    | 0.854(0.184)                      | <b>0.689(0.274)</b>                     | 19214           | 0.854(0.186)                      | <b>0.690(0.273)</b>                     | 448             |
| MaCH-Admix IBS-SQ    | 0.852(0.184)                      | 0.682(0.283)                            | 18357           | 0.854(0.186)                      | 0.678(0.289)                            | 450             |
| MaCH-Admix IBS-DQ    | 0.852(0.184)                      | 0.686(0.278)                            | 19201           | <b>0.855(0.186)</b>               | 0.689(0.277)                            | 453             |
| IMPUTE2              | <b>0.856(0.183)</b>               | 0.681(0.272)                            | 14430           | <b>0.855(0.187)</b>               | 0.686(0.286)                            | 660             |
| BEAGLE               | 0.846(0.186)                      | 0.666(0.279)                            | 17102           | 0.845(0.191)                      | 0.641(0.327)                            | 356             |
| chromosome8:18-23Mb  |                                   |                                         |                 |                                   |                                         |                 |
| MaCH-Admix Random    | 0.826(0.216)                      | 0.760(0.246)                            | 22069           | 0.830(0.216)                      | 0.754(0.244)                            | 524             |
| MaCH-Admix IBS-PW    | 0.838(0.211)                      | <b>0.775(0.240)</b>                     | 21194           | <b>0.838(0.213)</b>               | <b>0.763(0.238)</b>                     | 551             |
| MaCH-Admix IBS-SQ    | 0.832(0.213)                      | 0.765(0.241)                            | 22098           | 0.833(0.213)                      | 0.758(0.242)                            | 551             |
| MaCH-Admix IBS-DQ    | 0.833(0.213)                      | 0.768(0.241)                            | 22360           | 0.833(0.216)                      | 0.750(0.243)                            | 553             |
| IMPUTE2              | <b>0.839(0.207)</b>               | 0.772(0.236)                            | 17910           | 0.835(0.214)                      | 0.744(0.253)                            | 875             |
| BEAGLE               | 0.826(0.211)                      | 0.742(0.245)                            | 27236           | 0.822(0.215)                      | 0.732(0.258)                            | 543             |

All results were generated using the following parameter values: MaCH-Admix: `--rounds 30, --states 120, --imputeStates 500`; IMPUTE2: `-iter 30, -k 120, -k_hap 500`; BEAGLE: `niterations=10 nsamples=4`. Running time is measured in seconds. Best performance in each comparison is highlighted by bold font.



**Table S4.** Imputation Results of WHI-AA Individuals over Five 5Mb Regions with the HapMapII reference ( $H = 240$ )

|                      | All 8421 Individuals              |                                         |                 | Random 200 Subset                 |                                         |                 |
|----------------------|-----------------------------------|-----------------------------------------|-----------------|-----------------------------------|-----------------------------------------|-----------------|
|                      | overall dosage $r^2$<br>(std dev) | uncommon SNPs<br>dosage $r^2$ (std dev) | running<br>time | overall dosage $r^2$<br>(std dev) | uncommon SNPs<br>dosage $r^2$ (std dev) | running<br>time |
| chromosome3:80-85Mb  |                                   |                                         |                 |                                   |                                         |                 |
| MaCH-Admix Random    | 0.877(0.140)                      | <b>0.684(0.271)</b>                     | 56434           | 0.875(0.149)                      | 0.636(0.354)                            | 259             |
| MaCH-Admix IBS-PW    | 0.884(0.136)                      | 0.683(0.294)                            | 52858           | 0.877(0.149)                      | 0.641(0.369)                            | 275             |
| MaCH-Admix IBS-SQ    | 0.883(0.137)                      | 0.678(0.294)                            | 61142           | 0.877(0.148)                      | <b>0.645(0.356)</b>                     | 264             |
| MaCH-Admix IBS-DQ    | 0.883(0.137)                      | 0.677(0.297)                            | 56255           | 0.876(0.150)                      | 0.627(0.349)                            | 265             |
| IMPUTE2              | <b>0.885(0.135)</b>               | 0.668(0.290)                            | 25283           | <b>0.879(0.148)</b>               | 0.613(0.371)                            | 388             |
| BEAGLE               | 0.842(0.164)                      | 0.575(0.259)                            | 116113          | 0.841(0.173)                      | 0.558(0.368)                            | 234             |
| chromosome1:75-80Mb  |                                   |                                         |                 |                                   |                                         |                 |
| MaCH-Admix Random    | 0.822(0.166)                      | 0.746(0.146)                            | 66325           | 0.811(0.174)                      | 0.746(0.176)                            | 394             |
| MaCH-Admix IBS-PW    | 0.830(0.160)                      | 0.759(0.143)                            | 73130           | <b>0.815(0.172)</b>               | <b>0.757(0.194)</b>                     | 407             |
| MaCH-Admix IBS-SQ    | 0.830(0.160)                      | 0.762(0.143)                            | 75065           | 0.814(0.174)                      | 0.746(0.200)                            | 403             |
| MaCH-Admix IBS-DQ    | <b>0.831(0.160)</b>               | <b>0.764(0.144)</b>                     | 77968           | <b>0.815(0.173)</b>               | 0.751(0.198)                            | 402             |
| IMPUTE2              | 0.812(0.167)                      | 0.736(0.137)                            | 35170           | 0.794(0.181)                      | 0.712(0.167)                            | 556             |
| BEAGLE               | 0.798(0.185)                      | 0.685(0.167)                            | 142769          | 0.776(0.200)                      | 0.656(0.222)                            | 291             |
| chromosome4:57-62Mb  |                                   |                                         |                 |                                   |                                         |                 |
| MaCH-Admix Random    | 0.832(0.150)                      | 0.664(0.152)                            | 77490           | 0.831(0.154)                      | 0.679(0.177)                            | 368             |
| MaCH-Admix IBS-PW    | 0.841(0.144)                      | 0.686(0.149)                            | 74439           | 0.835(0.152)                      | 0.693(0.177)                            | 378             |
| MaCH-Admix IBS-SQ    | <b>0.842(0.143)</b>               | 0.689(0.143)                            | 74604           | <b>0.836(0.150)</b>               | <b>0.704(0.169)</b>                     | 400             |
| MaCH-Admix IBS-DQ    | <b>0.842(0.143)</b>               | <b>0.691(0.142)</b>                     | 76374           | 0.835(0.152)                      | 0.693(0.159)                            | 384             |
| IMPUTE2              | 0.826(0.153)                      | 0.654(0.160)                            | 34875           | 0.816(0.162)                      | 0.666(0.177)                            | 513             |
| BEAGLE               | 0.798(0.183)                      | 0.552(0.271)                            | 145240          | 0.788(0.199)                      | 0.464(0.261)                            | 298             |
| chromosome14:50-55Mb |                                   |                                         |                 |                                   |                                         |                 |
| MaCH-Admix Random    | 0.770(0.195)                      | 0.628(0.288)                            | 82618           | 0.780(0.199)                      | 0.671(0.278)                            | 427             |
| MaCH-Admix IBS-PW    | 0.781(0.188)                      | 0.645(0.279)                            | 77589           | 0.784(0.195)                      | 0.681(0.268)                            | 442             |
| MaCH-Admix IBS-SQ    | 0.780(0.187)                      | 0.647(0.280)                            | 82175           | 0.786(0.196)                      | 0.679(0.262)                            | 436             |
| MaCH-Admix IBS-DQ    | 0.780(0.188)                      | 0.644(0.283)                            | 90951           | 0.787(0.194)                      | 0.678(0.265)                            | 450             |
| IMPUTE2              | <b>0.791(0.180)</b>               | <b>0.667(0.270)</b>                     | 39702           | <b>0.789(0.194)</b>               | <b>0.689(0.265)</b>                     | 597             |
| BEAGLE               | 0.742(0.210)                      | 0.553(0.308)                            | 124661          | 0.739(0.221)                      | 0.579(0.315)                            | 336             |
| chromosome8:18-23Mb  |                                   |                                         |                 |                                   |                                         |                 |
| MaCH-Admix Random    | 0.754(0.222)                      | 0.619(0.241)                            | 99090           | 0.758(0.216)                      | 0.649(0.233)                            | 570             |
| MaCH-Admix IBS-PW    | 0.764(0.217)                      | 0.641(0.240)                            | 104999          | 0.764(0.214)                      | 0.665(0.230)                            | 584             |
| MaCH-Admix IBS-SQ    | 0.768(0.214)                      | 0.654(0.235)                            | 95685           | 0.765(0.213)                      | <b>0.677(0.232)</b>                     | 593             |
| MaCH-Admix IBS-DQ    | 0.768(0.213)                      | 0.655(0.236)                            | 104526          | 0.765(0.213)                      | 0.672(0.236)                            | 590             |
| IMPUTE2              | <b>0.779(0.203)</b>               | <b>0.659(0.232)</b>                     | 53975           | <b>0.769(0.209)</b>               | 0.675(0.225)                            | 869             |
| BEAGLE               | 0.717(0.232)                      | 0.535(0.243)                            | 162132          | 0.709(0.237)                      | 0.543(0.269)                            | 452             |

All results were generated using the following parameter values: MaCH-Admix: `--rounds 30, --states 120, --imputeStates 500`; IMPUTE2: `-iter 30, -k 120, -k_hap 500`; BEAGLE: `niterations=10 nsamples=4`. Running time is measured in seconds. Best performance in each comparison is highlighted by bold font.

**Table S5A.** Imputation Results of 49 ASW Individuals Over All Five Short Regions

|                      | HapMapII CEU+YRI reference        |                                         |                 | HapMapIII CEU+YRI reference       |                                         |                 |
|----------------------|-----------------------------------|-----------------------------------------|-----------------|-----------------------------------|-----------------------------------------|-----------------|
|                      | overall dosage $r^2$<br>(std dev) | uncommon SNPs<br>dosage $r^2$ (std dev) | running<br>time | overall dosage $r^2$<br>(std dev) | uncommon SNPs<br>dosage $r^2$ (std dev) | running<br>time |
| chromosome3:80-85Mb  |                                   |                                         |                 |                                   |                                         |                 |
| MaCH-Admix Random    | 0.937(0.106)                      | 0.721(0.230)                            | 168             | 0.942(0.121)                      | 0.833(0.275)                            | 138             |
| MaCH-Admix AW        | 0.938(0.102)                      | 0.766(0.191)                            | 126             | 0.944(0.120)                      | 0.837(0.275)                            | 147             |
| MaCH-Admix IBS-PW    | <b>0.940(0.099)</b>               | 0.787(0.190)                            | 125             | <b>0.946(0.111)</b>               | <b>0.860(0.249)</b>                     | 158             |
| MaCH-Admix IBS-SQ    | 0.939(0.100)                      | 0.759(0.184)                            | 128             | 0.943(0.121)                      | 0.836(0.281)                            | 158             |
| MaCH-Admix IBS-DQ    | 0.937(0.106)                      | 0.739(0.209)                            | 132             | <b>0.946(0.112)</b>               | 0.857(0.249)                            | 149             |
| IMPUTE2              | 0.939(0.099)                      | <b>0.803(0.155)</b>                     | 288             | 0.942(0.119)                      | 0.850(0.264)                            | 316             |
| BEAGLE               | 0.906(0.140)                      | 0.702(0.276)                            | 177             | 0.921(0.141)                      | 0.796(0.296)                            | 131             |
| chromosome1:75-80Mb  |                                   |                                         |                 |                                   |                                         |                 |
| MaCH-Admix Random    | <b>0.916(0.123)</b>               | <b>0.862(0.201)</b>                     | 197             | 0.921(0.135)                      | 0.810(0.237)                            | 250             |
| MaCH-Admix AW        | 0.915(0.124)                      | 0.853(0.209)                            | 194             | 0.922(0.134)                      | 0.812(0.236)                            | 280             |
| MaCH-Admix IBS-PW    | 0.915(0.123)                      | 0.857(0.202)                            | 199             | <b>0.925(0.132)</b>               | <b>0.826(0.234)</b>                     | 258             |
| MaCH-Admix IBS-SQ    | 0.914(0.125)                      | 0.853(0.207)                            | 209             | 0.923(0.132)                      | 0.819(0.230)                            | 243             |
| MaCH-Admix IBS-DQ    | 0.914(0.125)                      | 0.858(0.211)                            | 206             | 0.923(0.135)                      | 0.815(0.240)                            | 246             |
| IMPUTE2              | 0.914(0.131)                      | 0.839(0.228)                            | 441             | 0.919(0.140)                      | 0.810(0.253)                            | 442             |
| BEAGLE               | 0.893(0.150)                      | 0.824(0.245)                            | 178             | 0.898(0.166)                      | 0.777(0.285)                            | 199             |
| chromosome4:57-62Mb  |                                   |                                         |                 |                                   |                                         |                 |
| MaCH-Admix Random    | 0.898(0.138)                      | 0.808(0.230)                            | 188             | 0.920(0.125)                      | 0.840(0.239)                            | 226             |
| MaCH-Admix AW        | 0.898(0.138)                      | 0.814(0.231)                            | 187             | <b>0.922(0.123)</b>               | <b>0.850(0.239)</b>                     | 210             |
| MaCH-Admix IBS-PW    | <b>0.900(0.136)</b>               | <b>0.821(0.231)</b>                     | 203             | <b>0.922(0.127)</b>               | 0.847(0.249)                            | 234             |
| MaCH-Admix IBS-SQ    | 0.899(0.141)                      | 0.811(0.238)                            | 192             | 0.920(0.127)                      | 0.841(0.243)                            | 230             |
| MaCH-Admix IBS-DQ    | 0.899(0.140)                      | 0.814(0.232)                            | 317             | 0.921(0.127)                      | 0.845(0.247)                            | 228             |
| IMPUTE2              | 0.897(0.140)                      | 0.813(0.233)                            | 415             | 0.920(0.128)                      | 0.837(0.245)                            | 452             |
| BEAGLE               | 0.868(0.166)                      | 0.775(0.252)                            | 182             | 0.900(0.146)                      | 0.803(0.280)                            | 170             |
| chromosome14:50-55Mb |                                   |                                         |                 |                                   |                                         |                 |
| MaCH-Admix Random    | 0.869(0.180)                      | 0.744(0.298)                            | 227             | 0.876(0.179)                      | 0.757(0.306)                            | 504             |
| MaCH-Admix AW        | 0.871(0.176)                      | <b>0.765(0.279)</b>                     | 232             | 0.880(0.177)                      | 0.766(0.304)                            | 282             |
| MaCH-Admix IBS-PW    | <b>0.873(0.177)</b>               | 0.762(0.293)                            | 249             | <b>0.881(0.178)</b>               | <b>0.769(0.304)</b>                     | 296             |
| MaCH-Admix IBS-SQ    | <b>0.873(0.176)</b>               | 0.761(0.289)                            | 240             | 0.879(0.178)                      | 0.765(0.302)                            | 311             |
| MaCH-Admix IBS-DQ    | <b>0.873(0.176)</b>               | 0.757(0.293)                            | 249             | 0.878(0.180)                      | 0.757(0.312)                            | 310             |
| IMPUTE2              | 0.870(0.180)                      | 0.756(0.289)                            | 497             | 0.879(0.180)                      | 0.766(0.301)                            | 523             |
| BEAGLE               | 0.841(0.199)                      | 0.688(0.332)                            | 189             | 0.849(0.201)                      | 0.694(0.340)                            | 214             |
| chromosome8:18-23Mb  |                                   |                                         |                 |                                   |                                         |                 |
| MaCH-Admix Random    | 0.861(0.170)                      | 0.813(0.247)                            | 329             | 0.849(0.189)                      | 0.766(0.285)                            | 392             |
| MaCH-Admix AW        | <b>0.863(0.171)</b>               | <b>0.824(0.249)</b>                     | 332             | 0.850(0.188)                      | 0.765(0.288)                            | 423             |
| MaCH-Admix IBS-PW    | 0.862(0.170)                      | <b>0.824(0.247)</b>                     | 332             | <b>0.853(0.189)</b>               | 0.761(0.296)                            | 423             |
| MaCH-Admix IBS-SQ    | 0.861(0.172)                      | 0.819(0.246)                            | 373             | 0.849(0.191)                      | <b>0.778(0.290)</b>                     | 508             |
| MaCH-Admix IBS-DQ    | 0.862(0.171)                      | 0.821(0.239)                            | 344             | 0.849(0.190)                      | 0.776(0.289)                            | 418             |
| IMPUTE2              | 0.860(0.175)                      | 0.793(0.263)                            | 658             | <b>0.853(0.194)</b>               | 0.767(0.299)                            | 767             |
| BEAGLE               | 0.820(0.200)                      | 0.728(0.303)                            | 241             | 0.825(0.206)                      | 0.732(0.309)                            | 269             |

All results were generated using the following parameter values: MaCH-Admix: `--rounds 30, --states 120`; IMPUTE2: `-iter 30, -k 120, -k_hap 500`; BEAGLE: `niterations=10 nsamples=4`. Best performance in each comparison is highlighted by bold font.

**Table S5B.** Imputation Results of 49 ASW Individuals Over All Five Short Regions

|                      | HapMapIII CEU+YRI+LWK+MKK reference<br>overall dosage $r^2$<br>(std dev) | uncommon SNPs<br>dosage $r^2$ (std dev) | running<br>time |
|----------------------|--------------------------------------------------------------------------|-----------------------------------------|-----------------|
| <hr/>                |                                                                          |                                         |                 |
| chromosome3:80-85Mb  |                                                                          |                                         |                 |
| MaCH-Admix Random    | 0.953(0.101)                                                             | 0.868(0.232)                            | 162             |
| MaCH-Admix AW        | 0.954(0.097)                                                             | 0.881(0.222)                            | 159             |
| MaCH-Admix IBS-PW    | <b>0.958(0.091)</b>                                                      | <b>0.898(0.208)</b>                     | 167             |
| MaCH-Admix IBS-SQ    | 0.954(0.100)                                                             | 0.871(0.233)                            | 179             |
| MaCH-Admix IBS-DQ    | 0.954(0.100)                                                             | 0.876(0.233)                            | 173             |
| IMPUTE2              | 0.952(0.100)                                                             | 0.877(0.225)                            | 291             |
| BEAGLE               | 0.934(0.124)                                                             | 0.811(0.271)                            | 334             |
| <hr/>                |                                                                          |                                         |                 |
| chromosome1:75-80Mb  |                                                                          |                                         |                 |
| MaCH-Admix Random    | 0.932(0.122)                                                             | 0.837(0.222)                            | 236             |
| MaCH-Admix AW        | 0.935(0.119)                                                             | 0.847(0.217)                            | 238             |
| MaCH-Admix IBS-PW    | <b>0.939(0.117)</b>                                                      | <b>0.858(0.222)</b>                     | 283             |
| MaCH-Admix IBS-SQ    | 0.935(0.124)                                                             | 0.841(0.235)                            | 270             |
| MaCH-Admix IBS-DQ    | 0.935(0.120)                                                             | 0.850(0.226)                            | 272             |
| IMPUTE2              | 0.932(0.124)                                                             | 0.846(0.225)                            | 553             |
| BEAGLE               | 0.918(0.144)                                                             | 0.819(0.259)                            | 491             |
| <hr/>                |                                                                          |                                         |                 |
| chromosome4:57-62Mb  |                                                                          |                                         |                 |
| MaCH-Admix Random    | 0.934(0.107)                                                             | 0.885(0.200)                            | 232             |
| MaCH-Admix AW        | 0.934(0.110)                                                             | 0.884(0.208)                            | 251             |
| MaCH-Admix IBS-PW    | <b>0.937(0.106)</b>                                                      | <b>0.892(0.200)</b>                     | 253             |
| MaCH-Admix IBS-SQ    | 0.934(0.110)                                                             | 0.879(0.211)                            | 247             |
| MaCH-Admix IBS-DQ    | 0.935(0.109)                                                             | 0.878(0.210)                            | 267             |
| IMPUTE2              | 0.929(0.120)                                                             | 0.861(0.237)                            | 426             |
| BEAGLE               | 0.914(0.132)                                                             | 0.833(0.256)                            | 469             |
| <hr/>                |                                                                          |                                         |                 |
| chromosome14:50-55Mb |                                                                          |                                         |                 |
| MaCH-Admix Random    | 0.883(0.170)                                                             | 0.756(0.301)                            | 318             |
| MaCH-Admix AW        | 0.886(0.168)                                                             | 0.772(0.295)                            | 309             |
| MaCH-Admix IBS-PW    | 0.891(0.167)                                                             | 0.778(0.304)                            | 352             |
| MaCH-Admix IBS-SQ    | 0.889(0.166)                                                             | 0.783(0.295)                            | 320             |
| MaCH-Admix IBS-DQ    | 0.890(0.166)                                                             | <b>0.786(0.294)</b>                     | 335             |
| IMPUTE2              | <b>0.893(0.168)</b>                                                      | 0.785(0.303)                            | 642             |
| BEAGLE               | 0.873(0.181)                                                             | 0.757(0.305)                            | 514             |
| <hr/>                |                                                                          |                                         |                 |
| chromosome8:18-23Mb  |                                                                          |                                         |                 |
| MaCH-Admix Random    | 0.863(0.178)                                                             | 0.781(0.274)                            | 431             |
| MaCH-Admix AW        | 0.865(0.180)                                                             | 0.788(0.285)                            | 417             |
| MaCH-Admix IBS-PW    | <b>0.871(0.177)</b>                                                      | 0.790(0.286)                            | 452             |
| MaCH-Admix IBS-SQ    | 0.867(0.180)                                                             | <b>0.800(0.281)</b>                     | 479             |
| MaCH-Admix IBS-DQ    | 0.867(0.178)                                                             | 0.785(0.281)                            | 462             |
| IMPUTE2              | 0.865(0.186)                                                             | <b>0.800(0.286)</b>                     | 923             |
| BEAGLE               | 0.848(0.190)                                                             | 0.768(0.292)                            | 718             |

All results were generated using the following parameter values: MaCH-Admix: `--rounds 30, --states 120`; IMPUTE2: `-iter 30, -k 120, -k_hap 500`; BEAGLE: `niterations=10 nsamples=4`. Best performance in each comparison is highlighted by bold font.

**Table S5C.** Imputation Results of 50 MEX Individuals Over All Five Short Regions

|                      | HapMapII CEU+YRI+JPT+CHB reference |                        |         | HapMapIII CEU+YRI+JPT+CHB reference |                        |         |
|----------------------|------------------------------------|------------------------|---------|-------------------------------------|------------------------|---------|
|                      | overall dosage $r^2$               | uncommon SNPs          | running | overall dosage $r^2$                | uncommon SNPs          | running |
|                      | (std dev)                          | dosage $r^2$ (std dev) | time    | (std dev)                           | dosage $r^2$ (std dev) | time    |
| chromosome3:80-85Mb  |                                    |                        |         |                                     |                        |         |
| MaCH-Admix Random    | <b>0.965(0.083)</b>                | 0.988(0.040)           | 114     | 0.956(0.112)                        | 0.893(0.227)           | 143     |
| MaCH-Admix AW        | <b>0.965(0.080)</b>                | 0.985(0.054)           | 120     | <b>0.957(0.109)</b>                 | 0.898(0.216)           | 144     |
| MaCH-Admix IBS-PW    | 0.964(0.082)                       | 0.989(0.037)           | 125     | <b>0.957(0.110)</b>                 | <b>0.899(0.222)</b>    | 184     |
| MaCH-Admix IBS-SQ    | 0.964(0.081)                       | 0.987(0.046)           | 124     | <b>0.957(0.110)</b>                 | 0.897(0.221)           | 164     |
| MaCH-Admix IBS-DQ    | 0.963(0.083)                       | 0.989(0.042)           | 122     | 0.956(0.112)                        | 0.896(0.223)           | 167     |
| IMPUTE2              | 0.961(0.089)                       | 0.986(0.036)           | 298     | <b>0.957(0.119)</b>                 | 0.898(0.237)           | 311     |
| BEAGLE               | 0.959(0.093)                       | <b>0.995(0.012)</b>    | 225     | 0.947(0.130)                        | 0.854(0.245)           | 232     |
| chromosome1:75-80Mb  |                                    |                        |         |                                     |                        |         |
| MaCH-Admix Random    | 0.927(0.136)                       | 0.832(0.244)           | 192     | 0.923(0.165)                        | 0.818(0.296)           | 255     |
| MaCH-Admix AW        | 0.929(0.134)                       | 0.827(0.240)           | 186     | 0.924(0.168)                        | 0.814(0.306)           | 248     |
| MaCH-Admix IBS-PW    | <b>0.930(0.134)</b>                | <b>0.838(0.245)</b>    | 209     | <b>0.926(0.169)</b>                 | 0.819(0.312)           | 272     |
| MaCH-Admix IBS-SQ    | 0.926(0.136)                       | <b>0.838(0.221)</b>    | 203     | 0.921(0.171)                        | <b>0.829(0.308)</b>    | 251     |
| MaCH-Admix IBS-DQ    | 0.926(0.139)                       | 0.832(0.230)           | 220     | 0.922(0.170)                        | 0.822(0.309)           | 262     |
| IMPUTE2              | 0.927(0.141)                       | 0.820(0.250)           | 471     | 0.923(0.177)                        | 0.801(0.317)           | 476     |
| BEAGLE               | 0.915(0.146)                       | 0.806(0.245)           | 239     | 0.908(0.191)                        | 0.775(0.338)           | 299     |
| chromosome4:57-62Mb  |                                    |                        |         |                                     |                        |         |
| MaCH-Admix Random    | 0.928(0.147)                       | 0.806(0.296)           | 183     | <b>0.928(0.160)</b>                 | 0.840(0.286)           | 219     |
| MaCH-Admix AW        | <b>0.929(0.146)</b>                | 0.806(0.286)           | 189     | 0.927(0.162)                        | 0.838(0.289)           | 214     |
| MaCH-Admix IBS-PW    | 0.928(0.149)                       | 0.802(0.304)           | 200     | 0.927(0.161)                        | 0.844(0.287)           | 238     |
| MaCH-Admix IBS-SQ    | 0.928(0.148)                       | <b>0.812(0.286)</b>    | 286     | 0.926(0.163)                        | <b>0.851(0.288)</b>    | 235     |
| MaCH-Admix IBS-DQ    | 0.927(0.149)                       | 0.809(0.292)           | 193     | <b>0.928(0.161)</b>                 | 0.839(0.291)           | 238     |
| IMPUTE2              | 0.925(0.156)                       | 0.806(0.300)           | 435     | 0.925(0.169)                        | 0.832(0.298)           | 501     |
| BEAGLE               | 0.920(0.160)                       | 0.793(0.305)           | 230     | 0.919(0.172)                        | 0.824(0.304)           | 320     |
| chromosome14:50-55Mb |                                    |                        |         |                                     |                        |         |
| MaCH-Admix Random    | <b>0.922(0.158)</b>                | 0.895(0.167)           | 249     | 0.916(0.183)                        | 0.823(0.290)           | 347     |
| MaCH-Admix AW        | 0.921(0.161)                       | 0.902(0.168)           | 273     | 0.915(0.183)                        | 0.816(0.292)           | 286     |
| MaCH-Admix IBS-PW    | <b>0.922(0.163)</b>                | 0.900(0.171)           | 252     | <b>0.918(0.182)</b>                 | 0.827(0.293)           | 335     |
| MaCH-Admix IBS-SQ    | 0.921(0.161)                       | <b>0.903(0.168)</b>    | 273     | 0.915(0.183)                        | 0.828(0.286)           | 316     |
| MaCH-Admix IBS-DQ    | 0.920(0.161)                       | 0.898(0.166)           | 263     | 0.917(0.181)                        | <b>0.840(0.287)</b>    | 315     |
| IMPUTE2              | <b>0.922(0.165)</b>                | 0.901(0.169)           | 541     | 0.916(0.182)                        | 0.827(0.290)           | 598     |
| BEAGLE               | 0.911(0.170)                       | 0.891(0.172)           | 276     | 0.908(0.190)                        | 0.813(0.299)           | 319     |
| chromosome8:18-23Mb  |                                    |                        |         |                                     |                        |         |
| MaCH-Admix Random    | 0.900(0.162)                       | 0.852(0.233)           | 316     | 0.886(0.191)                        | 0.824(0.284)           | 402     |
| MaCH-Admix AW        | 0.901(0.160)                       | 0.858(0.224)           | 336     | 0.885(0.196)                        | 0.815(0.294)           | 401     |
| MaCH-Admix IBS-PW    | <b>0.903(0.159)</b>                | 0.867(0.218)           | 327     | <b>0.888(0.197)</b>                 | <b>0.826(0.298)</b>    | 513     |
| MaCH-Admix IBS-SQ    | 0.900(0.163)                       | 0.863(0.223)           | 356     | 0.882(0.198)                        | 0.817(0.298)           | 465     |
| MaCH-Admix IBS-DQ    | 0.900(0.161)                       | 0.864(0.212)           | 329     | 0.883(0.199)                        | 0.813(0.301)           | 459     |
| IMPUTE2              | 0.898(0.164)                       | <b>0.871(0.199)</b>    | 716     | 0.879(0.205)                        | 0.811(0.302)           | 806     |
| BEAGLE               | 0.889(0.169)                       | 0.859(0.225)           | 340     | 0.870(0.211)                        | 0.788(0.320)           | 434     |

All results were generated using the following parameter values: MaCH-Admix: `--rounds 30, --states 120`; IMPUTE2: `-iter 30, -k 120, -k_hap 500`; BEAGLE: `niterations=10 nsamples=4`. Best performance in each comparison is highlighted by bold font.
